# Supplementary material for: Where women in agri-food systems are at highest climate risk: a methodology for mapping climate–agriculture–gender inequality hotspots
Source: Frontiers journal article supplement (doi:10.3389/fsufs.2023.1197809), 2023-11-16
Supplement: Data_Sheet_1.zip [file Data_Sheet_1.zip]

## Appendix E Robustness tests of subnational level risk indices

### Cereals, legumes and oilseeds

Pairwise correlation of indices (N=44; \* 95 percent significance level)

|                                                             | Risk index<br>Anderson (2008)<br>method | Risk index based on<br>average of<br>standardized<br>variables | PCA-based risk<br>index |
|-------------------------------------------------------------|-----------------------------------------|----------------------------------------------------------------|-------------------------|
| <b>Risk index Anderson (2008)<br/>method</b>                | 1                                       |                                                                |                         |
| Risk index based on average<br>of<br>standardized variables | 0.9833*                                 | 1                                                              |                         |
| PCA-based risk index                                        | 0.1713<br>0.2663                        | 0.2062<br>0.1792                                               | 1                       |

Spearman rank correlation (N=44; \* 95 percent significance level)

|                                                             | Risk index<br>Anderson (2008)<br>method | Risk index based on<br>average of<br>standardized<br>variables | PCA-based risk<br>index |
|-------------------------------------------------------------|-----------------------------------------|----------------------------------------------------------------|-------------------------|
| <b>Risk index Anderson (2008)<br/>method</b>                | 1                                       |                                                                |                         |
| Risk index based on average<br>of<br>standardized variables | 0.9797*                                 | 1                                                              |                         |
| PCA-based risk index                                        | 0.3662*<br>0.0145                       | 0.3436*<br>0.0224                                              | 1                       |

Classification difference test

|                      | Risk index<br>Anderson (2008)<br>method | Risk index based on<br>average of<br>standardized<br>variables | PCA-based risk<br>index |
|----------------------|-----------------------------------------|----------------------------------------------------------------|-------------------------|
| Highest risk tertile | 100%                                    | 93.3%                                                          | 60.0%                   |
| Middle risk tertile  | 100%                                    | 86.7%                                                          | 33.3%                   |
| Lowest risk tertile  | 100%                                    | 92.9%                                                          | 35.7%                   |

### Rice

Pairwise correlation of indices (N=44; \* 95 percent significance level)

|                                                             | Risk index<br>Anderson (2008)<br>method | Risk index based on<br>average of<br>standardized<br>variables | PCA-based risk<br>index |
|-------------------------------------------------------------|-----------------------------------------|----------------------------------------------------------------|-------------------------|
| <b>Risk index Anderson (2008)<br/>method</b>                | 1                                       |                                                                |                         |
| Risk index based on average<br>of<br>standardized variables | 0.9664*                                 | 1                                                              |                         |
| PCA-based risk index                                        | 0.0714<br>0.6452                        | 0.0936<br>0.5455                                               | 1                       |

Spearman rank correlation (N=44; \* 95 percent significance level)

|                                                             | <b>Risk index<br/>Anderson (2008)<br/>method</b> | Risk index based on<br>average of<br>standardized<br>variables | PCA-based risk<br>index |
|-------------------------------------------------------------|--------------------------------------------------|----------------------------------------------------------------|-------------------------|
| <b>Risk index Anderson (2008)<br/>method</b>                | 1                                                |                                                                |                         |
| Risk index based on average<br>of<br>standardized variables | 0.9594*<br>0                                     | 1                                                              |                         |
| PCA-based risk index                                        | -0.1594<br>0.3013                                | -0.0798<br>0.6067                                              | 1                       |

Classification difference test

|                      | <b>Risk index<br/>Anderson (2008)<br/>method</b> | Risk index based on<br>average of<br>standardized<br>variables | PCA-based risk<br>index |
|----------------------|--------------------------------------------------|----------------------------------------------------------------|-------------------------|
| Highest risk tertile | 100%                                             | 86.7%                                                          | 20.0%                   |
| Middle risk tertile  | 100%                                             | 80.0%                                                          | 33.3%                   |
| Lowest risk tertile  | 100%                                             | 92.9%                                                          | 14.3%                   |

### Vegetables, melons, roots and tubers

Pairwise correlation of indices (N=44; \* 95 percent significance level)

|                                                             | <b>Risk index<br/>Anderson (2008)<br/>method</b> | Risk index based on<br>average of<br>standardized<br>variables | PCA-based risk<br>index |
|-------------------------------------------------------------|--------------------------------------------------|----------------------------------------------------------------|-------------------------|
| <b>Risk index Anderson (2008)<br/>method</b>                | 1                                                |                                                                |                         |
| Risk index based on average<br>of<br>standardized variables | 0.9836*<br>0                                     | 1                                                              |                         |
| PCA-based risk index                                        | 0.8398*<br>0                                     | 0.9081*<br>0                                                   | 1                       |

Spearman rank correlation (N=44; \* 95 percent significance level)

|                                                             | <b>Risk index<br/>Anderson (2008)<br/>method</b> | Risk index based on<br>average of<br>standardized<br>variables | PCA-based risk<br>index |
|-------------------------------------------------------------|--------------------------------------------------|----------------------------------------------------------------|-------------------------|
| <b>Risk index Anderson (2008)<br/>method</b>                | 1                                                |                                                                |                         |
| Risk index based on average<br>of<br>standardized variables | 0.9824*<br>0                                     | 1                                                              |                         |
| PCA-based risk index                                        | 0.8545*<br>0                                     | 0.9073*<br>0                                                   | 1                       |

Classification difference test

|  | <b>Risk index<br/>Anderson (2008)<br/>method</b> | Risk index based on<br>average of<br>standardized<br>variables | PCA-based risk<br>index |
|--|--------------------------------------------------|----------------------------------------------------------------|-------------------------|
|--|--------------------------------------------------|----------------------------------------------------------------|-------------------------|

|                      |      |       |       |
|----------------------|------|-------|-------|
| Highest risk tertile | 100% | 93.3% | 86.7% |
| Middle risk tertile  | 100% | 80.0% | 53.3% |
| Lowest risk tertile  | 100% | 85.7% | 64.3% |

## Perennials

Pairwise correlation of indices (N=44; \* 95 percent significance level)

|                                                             | Risk index<br>Anderson (2008)<br>method | Risk index based on<br>average of<br>standardized<br>variables | PCA-based risk<br>index |
|-------------------------------------------------------------|-----------------------------------------|----------------------------------------------------------------|-------------------------|
| <b>Risk index Anderson (2008)<br/>method</b>                | 1                                       |                                                                |                         |
| Risk index based on average<br>of<br>standardized variables | 0.9838*<br>0                            | 1                                                              |                         |
| PCA-based risk index                                        | 0.2236<br>0.1445                        | 0.3259*<br>0.0309                                              | 1                       |

Spearman rank correlation (N=44; \* 95 percent significance level)

|                                                             | Risk index<br>Anderson (2008)<br>method | Risk index based on<br>average of<br>standardized<br>variables | PCA-based risk<br>index |
|-------------------------------------------------------------|-----------------------------------------|----------------------------------------------------------------|-------------------------|
| <b>Risk index Anderson (2008)<br/>method</b>                | 1                                       |                                                                |                         |
| Risk index based on average<br>of<br>standardized variables | 0.9849*<br>0                            | 1                                                              |                         |
| PCA-based risk index                                        | 0.2808<br>0.0649                        | 0.3333*<br>0.027                                               | 1                       |

Classification difference test

|                      | Risk index<br>Anderson (2008)<br>method | Risk index based on<br>average of<br>standardized<br>variables | PCA-based risk<br>index |
|----------------------|-----------------------------------------|----------------------------------------------------------------|-------------------------|
| Highest risk tertile | 100%                                    | 93.3%                                                          | 46.7%                   |
| Middle risk tertile  | 100%                                    | 86.7%                                                          | 13.3%                   |
| Lowest risk tertile  | 100%                                    | 92.9%                                                          | 35.7%                   |

## Livestock

Pairwise correlation of indices (N=44; \* 95 percent significance level)

|                                                             | Risk index<br>Anderson (2008)<br>method | Risk index based on<br>average of<br>standardized<br>variables | PCA-based risk<br>index |
|-------------------------------------------------------------|-----------------------------------------|----------------------------------------------------------------|-------------------------|
| <b>Risk index Anderson (2008)<br/>method</b>                | 1                                       |                                                                |                         |
| Risk index based on average<br>of<br>standardized variables | 0.9808*<br>0                            | 1                                                              |                         |
| PCA-based risk index                                        | 0.8592*<br>0                            | 0.9357*<br>0                                                   | 1                       |

Spearman rank correlation (N=44; \* 95 percent significance level)

|                                                             | Risk index<br>Anderson (2008)<br>method | Risk index based on<br>average of<br>standardized<br>variables | PCA-based risk<br>index |
|-------------------------------------------------------------|-----------------------------------------|----------------------------------------------------------------|-------------------------|
| <b>Risk index Anderson (2008)<br/>method</b>                | 1                                       |                                                                |                         |
| Risk index based on average<br>of<br>standardized variables | 0.9735*<br>0                            | 1                                                              |                         |
| PCA-based risk index                                        | 0.8795*<br>0                            | 0.9473*<br>0                                                   | 1                       |

Classification difference test

|                      | Risk index<br>Anderson (2008)<br>method | Risk index based on<br>average of<br>standardized<br>variables | PCA-based risk<br>index |
|----------------------|-----------------------------------------|----------------------------------------------------------------|-------------------------|
| Highest risk tertile | 100%                                    | 86.7%                                                          | 80.0%                   |
| Middle risk tertile  | 100%                                    | 66.7%                                                          | 53.3%                   |
| Lowest risk tertile  | 100%                                    | 78.6%                                                          | 64.3%                   |

### Mixed farming

Pairwise correlation of indices (N=44; \* 95 percent significance level)

|                                                             | Risk index<br>Anderson (2008)<br>method | Risk index based on<br>average of<br>standardized<br>variables | PCA-based risk<br>index |
|-------------------------------------------------------------|-----------------------------------------|----------------------------------------------------------------|-------------------------|
| <b>Risk index Anderson (2008)<br/>method</b>                | 1                                       |                                                                |                         |
| Risk index based on average<br>of<br>standardized variables | 0.9972*<br>0                            | 1                                                              |                         |
| PCA-based risk index                                        | 0.6826*<br>0                            | 0.7345*<br>0                                                   | 1                       |

Spearman rank correlation (N=44; \* 95 percent significance level)

|                                                             | Risk index<br>Anderson (2008)<br>method | Risk index based on<br>average of<br>standardized<br>variables | PCA-based risk<br>index |
|-------------------------------------------------------------|-----------------------------------------|----------------------------------------------------------------|-------------------------|
| <b>Risk index Anderson (2008)<br/>method</b>                | 1                                       |                                                                |                         |
| Risk index based on average<br>of<br>standardized variables | 0.9928*<br>0                            | 1                                                              |                         |
| PCA-based risk index                                        | 0.6692*<br>0                            | 0.7270*<br>0                                                   | 1                       |

Classification difference test

|                      | Risk index<br>Anderson (2008)<br>method | Risk index based on<br>average of<br>standardized<br>variables | PCA-based risk<br>index |
|----------------------|-----------------------------------------|----------------------------------------------------------------|-------------------------|
| Highest risk tertile | 100%                                    | 100.0%                                                         | 60.0%                   |

|                     |      |       |       |
|---------------------|------|-------|-------|
| Middle risk tertile | 100% | 93.3% | 33.3% |
| Lowest risk tertile | 100% | 92.9% | 64.3% |
