# Supplementary material for: Where women in agri-food systems are at highest climate risk: a methodology for mapping climate–agriculture–gender inequality hotspots
Source: Frontiers journal article supplement (doi:10.3389/fsufs.2023.1197809), 2023-11-16
Supplement: Data_Sheet_1.zip [file Data_Sheet_1.zip]

## Appendix B Robustness tests of national level hotspot risk index

Pairwise correlation of indices (N=87; \* 95 percent significance level)

|                                                                  | PCA-based risk index | Risk index based on<br>average of<br>standardized variables | Risk index Anderson<br>(2008) method |
|------------------------------------------------------------------|----------------------|-------------------------------------------------------------|--------------------------------------|
| PCA-based risk index                                             | 1                    |                                                             |                                      |
| <b>Risk index based on average of<br/>standardized variables</b> | 0.6120*<br>0.0000    | 1                                                           |                                      |
| Risk index Anderson (2008) method                                | 0.4124*<br>0.0001    | 0.9716*<br>0.0000                                           | 1                                    |

Spearman rank correlation (N=87; \* 95 percent significance level)

|                                                                  | PCA-based risk index | Risk index based on<br>average of<br>standardized variables | Risk index Anderson<br>(2008) method |
|------------------------------------------------------------------|----------------------|-------------------------------------------------------------|--------------------------------------|
| PCA-based risk index                                             | 1                    |                                                             |                                      |
| <b>Risk index based on average of<br/>standardized variables</b> | 0.5414*<br>0.0000    | 1                                                           |                                      |
| Risk index Anderson (2008) method                                | 0.3303*<br>0.0019    | 0.9614*<br>0.0000                                           | 1                                    |

Classification difference test

|                      | PCA-based risk index | Base: Risk index based<br>on average of<br>standardized variables | Risk index Anderson<br>(2008) method |
|----------------------|----------------------|-------------------------------------------------------------------|--------------------------------------|
| Highest risk tertile | 50%                  | 100%                                                              | 90%                                  |
| Middle risk tertile  | 37%                  | 100%                                                              | 73%                                  |
| Lowest risk tertile  | 56%                  | 100%                                                              | 81%                                  |
