# Supplementary material for: Where women in agri-food systems are at highest climate risk: a methodology for mapping climate–agriculture–gender inequality hotspots
Source: Frontiers journal article supplement (doi:10.3389/fsufs.2023.1197809), 2023-11-16
Supplement: Data_Sheet_1.zip [file Data_Sheet_1.zip]

## Appendix A Ranking of low- and middle-income countries by the country level climate–agriculture–gender inequality hotspot index

| Ranking | Country                     | Climate hazard indicator                                          |              | Exposure indicator                                  |              | Vulnerability linked to gender inequality indicator |              | Risk index                                            | Robustness test      |                                   |
|---------|-----------------------------|-------------------------------------------------------------------|--------------|-----------------------------------------------------|--------------|-----------------------------------------------------|--------------|-------------------------------------------------------|----------------------|-----------------------------------|
|         |                             | Share of total rural population under climate hazard 2050 (CCAFS) | Standardized | Share of adult female agricultural labor 2019 (ILO) | Standardized | Social Institutions and Gender Index 2014 (OECD)    | Standardized | Risk index based on average of standardized variables | PCA-based risk index | Risk index Anderson (2008) method |
| 1       | Yemen                       | 0.707                                                             | 0.930        | 0.615                                               | 1.170        | 0.563                                               | 2.453        | <b>1.518</b>                                          | 1.939                | 1.398                             |
| 2       | Bangladesh                  | 0.909                                                             | 1.734        | 0.656                                               | 1.469        | 0.390                                               | 1.210        | <b>1.471</b>                                          | 1.026                | 1.516                             |
| 3       | Somalia                     | 0.781                                                             | 1.224        | 0.514                                               | 0.451        | 0.459                                               | 1.708        | <b>1.127</b>                                          | 0.875                | 1.108                             |
| 4       | Pakistan                    | 0.749                                                             | 1.097        | 0.687                                               | 1.687        | 0.301                                               | 0.575        | <b>1.120</b>                                          | 1.029                | 1.146                             |
| 5       | Sudan                       | 0.422                                                             | -0.208       | 0.607                                               | 1.112        | 0.555                                               | 2.393        | <b>1.099</b>                                          | 2.328                | 0.875                             |
| 6       | Gambia                      | 0.441                                                             | -0.134       | 0.594                                               | 1.025        | 0.524                                               | 2.171        | <b>1.021</b>                                          | 2.100                | 0.822                             |
| 7       | Afghanistan                 | 0.676                                                             | 0.806        | 0.640                                               | 1.349        | 0.322                                               | 0.726        | <b>0.960</b>                                          | 1.020                | 0.954                             |
| 8       | Nepal                       | 0.744                                                             | 1.075        | 0.587                                               | 0.972        | 0.323                                               | 0.730        | <b>0.926</b>                                          | 0.663                | 0.954                             |
| 9       | Syrian Arab Republic        | 0.805                                                             | 1.321        | 0.391                                               | -0.436       | 0.416                                               | 1.398        | <b>0.761</b>                                          | 0.054                | 0.794                             |
| 10      | Lebanon                     | 0.924                                                             | 1.794        | 0.444                                               | -0.053       | 0.290                                               | 0.492        | <b>0.744</b>                                          | -0.458               | 0.883                             |
| 11      | Chad                        | 0.482                                                             | 0.032        | 0.490                                               | 0.274        | 0.467                                               | 1.759        | <b>0.688</b>                                          | 1.277                | 0.553                             |
| 12      | India                       | 0.679                                                             | 0.819        | 0.580                                               | 0.924        | 0.265                                               | 0.315        | <b>0.686</b>                                          | 0.474                | 0.721                             |
| 13      | Zambia                      | 0.381                                                             | -0.373       | 0.548                                               | 0.693        | 0.449                                               | 1.633        | <b>0.651</b>                                          | 1.639                | 0.477                             |
| 14      | Sri Lanka                   | 0.845                                                             | 1.482        | 0.539                                               | 0.628        | 0.189                                               | -0.227       | <b>0.627</b>                                          | -0.333               | 0.775                             |
| 15      | Egypt                       | 0.462                                                             | -0.047       | 0.509                                               | 0.412        | 0.428                                               | 1.483        | <b>0.616</b>                                          | 1.226                | 0.491                             |
| 16      | Morocco                     | 0.769                                                             | 1.178        | 0.656                                               | 1.465        | 0.105                                               | -0.831       | <b>0.604</b>                                          | -0.037               | 0.749                             |
| 17      | Gabon                       | 0.084                                                             | -1.558       | 0.686                                               | 1.679        | 0.402                                               | 1.298        | <b>0.473</b>                                          | 2.563                | 0.187                             |
| 18      | Mali                        | 0.192                                                             | -1.127       | 0.501                                               | 0.355        | 0.516                                               | 2.116        | <b>0.448</b>                                          | 2.028                | 0.172                             |
| 19      | Uzbekistan                  | 0.911                                                             | 1.744        | 0.468                                               | 0.118        | 0.148                                               | -0.527       | <b>0.445</b>                                          | -0.966               | 0.651                             |
| 20      | Swaziland                   | 0.855                                                             | 1.521        | 0.420                                               | -0.228       | 0.212                                               | -0.066       | <b>0.409</b>                                          | -0.812               | 0.567                             |
| 21      | Iraq                        | 0.710                                                             | 0.942        | 0.446                                               | -0.036       | 0.263                                               | 0.301        | <b>0.402</b>                                          | -0.219               | 0.472                             |
| 22      | Niger                       | 0.320                                                             | -0.615       | 0.482                                               | 0.215        | 0.442                                               | 1.580        | <b>0.393</b>                                          | 1.389                | 0.210                             |
| 23      | Tajikistan                  | 0.562                                                             | 0.350        | 0.629                                               | 1.276        | 0.139                                               | -0.586       | <b>0.347</b>                                          | 0.331                | 0.396                             |
| 24      | Uganda                      | 0.573                                                             | 0.396        | 0.532                                               | 0.574        | 0.216                                               | -0.034       | <b>0.312</b>                                          | 0.196                | 0.340                             |
| 25      | DR Congo                    | 0.151                                                             | -1.292       | 0.555                                               | 0.739        | 0.428                                               | 1.480        | <b>0.309</b>                                          | 1.948                | 0.056                             |
| 26      | Mongolia                    | 1.000                                                             | 2.099        | 0.464                                               | 0.088        | 0.035                                               | -1.337       | <b>0.283</b>                                          | -1.641               | 0.586                             |
| 27      | Myanmar                     | 0.531                                                             | 0.227        | 0.444                                               | -0.056       | 0.294                                               | 0.519        | <b>0.230</b>                                          | 0.197                | 0.214                             |
| 28      | Mozambique                  | 0.527                                                             | 0.210        | 0.571                                               | 0.861        | 0.138                                               | -0.599       | <b>0.157</b>                                          | 0.105                | 0.204                             |
| 29      | Nigeria                     | 0.472                                                             | -0.008       | 0.346                                               | -0.755       | 0.391                                               | 1.218        | <b>0.152</b>                                          | 0.273                | 0.076                             |
| 30      | Kenya                       | 0.410                                                             | -0.256       | 0.545                                               | 0.670        | 0.216                                               | -0.039       | <b>0.125</b>                                          | 0.523                | 0.088                             |
| 31      | Cameroon                    | 0.265                                                             | -0.836       | 0.545                                               | 0.672        | 0.280                                               | 0.424        | <b>0.087</b>                                          | 1.052                | -0.041                            |
| 32      | Azerbaijan                  | 0.276                                                             | -0.793       | 0.578                                               | 0.904        | 0.240                                               | 0.138        | <b>0.083</b>                                          | 1.007                | -0.024                            |
| 33      | Thailand                    | 0.736                                                             | 1.044        | 0.453                                               | 0.014        | 0.106                                               | -0.828       | <b>0.077</b>                                          | -0.938               | 0.240                             |
| 34      | Lesotho                     | 0.754                                                             | 1.115        | 0.455                                               | 0.027        | 0.088                                               | -0.957       | <b>0.062</b>                                          | -1.040               | 0.242                             |
| 35      | Togo                        | 0.626                                                             | 0.605        | 0.415                                               | -0.264       | 0.186                                               | -0.252       | <b>0.030</b>                                          | -0.580               | 0.113                             |
| 36      | United Republic Of Tanzania | 0.334                                                             | -0.558       | 0.512                                               | 0.433        | 0.250                                               | 0.210        | <b>0.028</b>                                          | 0.646                | -0.051                            |
| 37      | Armenia                     | 0.282                                                             | -0.767       | 0.554                                               | 0.732        | 0.236                                               | 0.107        | <b>0.024</b>                                          | 0.864                | -0.075                            |
| 38      | Ghana                       | 0.483                                                             | 0.035        | 0.378                                               | -0.528       | 0.299                                               | 0.557        | <b>0.021</b>                                          | -0.012               | -0.006                            |

| Ranking | Country                          | Climate hazard indicator                                          |        | Exposure indicator                                  |        | Vulnerability linked to gender inequality indicator |        | Risk index                                            | Robustness test      |                                   |
|---------|----------------------------------|-------------------------------------------------------------------|--------|-----------------------------------------------------|--------|-----------------------------------------------------|--------|-------------------------------------------------------|----------------------|-----------------------------------|
|         |                                  | Share of total rural population under climate hazard 2050 (CCAFS) |        | Share of adult female agricultural labor 2019 (ILO) |        | Social Institutions and Gender Index 2014 (OECD)    |        | Risk index based on average of standardized variables | PCA-based risk index | Risk index Anderson (2008) method |
| 39      | Mauritania                       | 0.284                                                             | -0.760 | 0.386                                               | -0.468 | 0.395                                               | 1.249  | <b>0.007</b>                                          | 0.788                | -0.150                            |
| 40      | Turkey                           | 0.374                                                             | -0.401 | 0.628                                               | 1.265  | 0.103                                               | -0.845 | <b>0.006</b>                                          | 0.466                | 0.003                             |
| 41      | Zimbabwe                         | 0.491                                                             | 0.065  | 0.525                                               | 0.529  | 0.139                                               | -0.587 | <b>0.002</b>                                          | -0.047               | 0.041                             |
| 42      | Ivory Coast                      | 0.508                                                             | 0.134  | 0.400                                               | -0.372 | 0.254                                               | 0.234  | <b>-0.001</b>                                         | -0.153               | 0.002                             |
| 43      | Benin                            | 0.469                                                             | -0.022 | 0.390                                               | -0.439 | 0.278                                               | 0.408  | <b>-0.018</b>                                         | -0.024               | -0.041                            |
| 44      | Malawi                           | 0.323                                                             | -0.604 | 0.536                                               | 0.604  | 0.207                                               | -0.099 | <b>-0.033</b>                                         | 0.583                | -0.098                            |
| 45      | Angola                           | 0.341                                                             | -0.533 | 0.560                                               | 0.777  | 0.172                                               | -0.353 | <b>-0.036</b>                                         | 0.508                | -0.079                            |
| 46      | China                            | 0.627                                                             | 0.609  | 0.441                                               | -0.078 | 0.131                                               | -0.646 | <b>-0.038</b>                                         | -0.707               | 0.071                             |
| 47      | Viet Nam                         | 0.388                                                             | -0.343 | 0.514                                               | 0.447  | 0.187                                               | -0.248 | <b>-0.048</b>                                         | 0.279                | -0.073                            |
| 48      | Kazakhstan                       | 0.610                                                             | 0.540  | 0.448                                               | -0.026 | 0.120                                               | -0.727 | <b>-0.071</b>                                         | -0.696               | 0.037                             |
| 49      | Jordan                           | 0.682                                                             | 0.830  | 0.211                                               | -1.728 | 0.312                                               | 0.651  | <b>-0.082</b>                                         | -1.070               | -0.012                            |
| 50      | Central African Republic         | 0.082                                                             | -1.565 | 0.518                                               | 0.477  | 0.329                                               | 0.770  | <b>-0.106</b>                                         | 1.439                | -0.327                            |
| 51      | Cambodia                         | 0.549                                                             | 0.299  | 0.529                                               | 0.552  | 0.048                                               | -1.243 | <b>-0.130</b>                                         | -0.540               | -0.020                            |
| 52      | Guinea                           | 0.089                                                             | -1.537 | 0.511                                               | 0.424  | 0.321                                               | 0.713  | <b>-0.134</b>                                         | 1.356                | -0.346                            |
| 53      | Senegal                          | 0.458                                                             | -0.066 | 0.423                                               | -0.202 | 0.199                                               | -0.162 | <b>-0.143</b>                                         | -0.208               | -0.133                            |
| 54      | Liberia                          | 0.027                                                             | -1.783 | 0.474                                               | 0.163  | 0.383                                               | 1.159  | <b>-0.154</b>                                         | 1.565                | -0.418                            |
| 55      | Jamaica                          | 0.794                                                             | 1.278  | 0.282                                               | -1.215 | 0.135                                               | -0.617 | <b>-0.185</b>                                         | -1.713               | 0.013                             |
| 56      | Philippines                      | 0.642                                                             | 0.668  | 0.322                                               | -0.932 | 0.177                                               | -0.320 | <b>-0.194</b>                                         | -1.090               | -0.085                            |
| 57      | Namibia                          | 0.496                                                             | 0.088  | 0.460                                               | 0.059  | 0.117                                               | -0.744 | <b>-0.199</b>                                         | -0.466               | -0.136                            |
| 58      | Sierra Leone                     | 0.002                                                             | -1.885 | 0.472                                               | 0.149  | 0.372                                               | 1.081  | <b>-0.218</b>                                         | 1.549                | -0.486                            |
| 59      | Indonesia                        | 0.393                                                             | -0.324 | 0.469                                               | 0.123  | 0.153                                               | -0.487 | <b>-0.229</b>                                         | -0.093               | -0.227                            |
| 60      | Rwanda                           | 0.201                                                             | -1.091 | 0.572                                               | 0.868  | 0.134                                               | -0.625 | <b>-0.283</b>                                         | 0.624                | -0.361                            |
| 61      | Haiti                            | 0.780                                                             | 1.221  | 0.236                                               | -1.549 | 0.147                                               | -0.534 | <b>-0.287</b>                                         | -1.858               | -0.094                            |
| 62      | Kyrgyzstan                       | 0.289                                                             | -0.738 | 0.489                                               | 0.272  | 0.160                                               | -0.439 | <b>-0.302</b>                                         | 0.204                | -0.347                            |
| 63      | Tunisia                          | 0.436                                                             | -0.153 | 0.369                                               | -0.592 | 0.199                                               | -0.161 | <b>-0.302</b>                                         | -0.430               | -0.292                            |
| 64      | Georgia                          | 0.142                                                             | -1.328 | 0.523                                               | 0.515  | 0.204                                               | -0.126 | <b>-0.313</b>                                         | 0.803                | -0.444                            |
| 65      | Ecuador                          | 0.523                                                             | 0.194  | 0.463                                               | 0.080  | 0.042                                               | -1.282 | <b>-0.336</b>                                         | -0.834               | -0.223                            |
| 66      | Ethiopia                         | 0.190                                                             | -1.133 | 0.444                                               | -0.052 | 0.245                                               | 0.171  | <b>-0.338</b>                                         | 0.536                | -0.460                            |
| 67      | South Africa                     | 0.621                                                             | 0.587  | 0.370                                               | -0.587 | 0.060                                               | -1.155 | <b>-0.385</b>                                         | -1.355               | -0.228                            |
| 68      | Burkina Faso                     | 0.096                                                             | -1.508 | 0.416                                               | -0.256 | 0.282                                               | 0.436  | <b>-0.443</b>                                         | 0.721                | -0.616                            |
| 69      | Bhutan                           | 0.119                                                             | -1.416 | 0.560                                               | 0.781  | 0.114                                               | -0.766 | <b>-0.467</b>                                         | 0.611                | -0.565                            |
| 70      | Lao People's Democratic Republic | 0.136                                                             | -1.351 | 0.517                                               | 0.468  | 0.145                                               | -0.549 | <b>-0.477</b>                                         | 0.514                | -0.578                            |
| 71      | Burundi                          | 0.041                                                             | -1.729 | 0.545                                               | 0.673  | 0.166                                               | -0.393 | <b>-0.483</b>                                         | 0.902                | -0.637                            |
| 72      | Congo                            | 0.082                                                             | -1.567 | 0.478                                               | 0.192  | 0.203                                               | -0.128 | <b>-0.501</b>                                         | 0.686                | -0.648                            |
| 73      | Guatemala                        | 0.722                                                             | 0.991  | 0.190                                               | -1.878 | 0.132                                               | -0.640 | <b>-0.509</b>                                         | -2.048               | -0.323                            |
| 74      | Bolivia                          | 0.242                                                             | -0.925 | 0.497                                               | 0.323  | 0.058                                               | -1.170 | <b>-0.591</b>                                         | -0.146               | -0.600                            |
| 75      | El Salvador                      | 0.934                                                             | 1.836  | 0.118                                               | -2.390 | 0.049                                               | -1.233 | <b>-0.596</b>                                         | -3.105               | -0.272                            |
| 76      | Colombia                         | 0.653                                                             | 0.714  | 0.228                                               | -1.602 | 0.086                                               | -0.967 | <b>-0.618</b>                                         | -1.958               | -0.441                            |
| 77      | Peru                             | 0.191                                                             | -1.132 | 0.483                                               | 0.222  | 0.083                                               | -0.993 | <b>-0.634</b>                                         | -0.017               | -0.675                            |
| 78      | Nicaragua                        | 0.631                                                             | 0.624  | 0.156                                               | -2.123 | 0.160                                               | -0.441 | <b>-0.647</b>                                         | -1.935               | -0.506                            |
| 79      | Madagascar                       | 0.158                                                             | -1.263 | 0.468                                               | 0.119  | 0.100                                               | -0.866 | <b>-0.670</b>                                         | 0.048                | -0.731                            |
| 80      | Paraguay                         | 0.320                                                             | -0.616 | 0.362                                               | -0.645 | 0.058                                               | -1.169 | <b>-0.810</b>                                         | -0.912               | -0.768                            |
| 81      | Cuba                             | 0.601                                                             | 0.506  | 0.235                                               | -1.557 | 0.021                                               | -1.435 | <b>-0.829</b>                                         | -2.140               | -0.637                            |

| Ranking | Country            | Climate hazard indicator                                          |        | Exposure indicator                                  |        | Vulnerability linked to gender inequality indicator |        | Risk index                                            | Robustness test      |                                   |
|---------|--------------------|-------------------------------------------------------------------|--------|-----------------------------------------------------|--------|-----------------------------------------------------|--------|-------------------------------------------------------|----------------------|-----------------------------------|
|         |                    | Share of total rural population under climate hazard 2050 (CCAFS) |        | Share of adult female agricultural labor 2019 (ILO) |        | Social Institutions and Gender Index 2014 (OECD)    |        | Risk index based on average of standardized variables | PCA-based risk index | Risk index Anderson (2008) method |
| 82      | Costa Rica         | 0.595                                                             | 0.481  | 0.195                                               | -1.840 | 0.051                                               | -1.222 | <b>-0.861</b>                                         | -2.182               | -0.681                            |
| 83      | Honduras           | 0.534                                                             | 0.238  | 0.164                                               | -2.065 | 0.107                                               | -0.815 | <b>-0.881</b>                                         | -1.975               | -0.751                            |
| 84      | Brazil             | 0.422                                                             | -0.207 | 0.239                                               | -1.526 | 0.046                                               | -1.256 | <b>-0.997</b>                                         | -1.715               | -0.889                            |
| 85      | Dominican Republic | 0.594                                                             | 0.479  | 0.093                                               | -2.569 | 0.037                                               | -1.322 | <b>-1.137</b>                                         | -2.725               | -0.935                            |
| 86      | Argentina          | 0.302                                                             | -0.688 | 0.273                                               | -1.283 | 0.011                                               | -1.508 | <b>-1.160</b>                                         | -1.517               | -1.085                            |
| 87      | Venezuela          | 0.245                                                             | -0.917 | 0.070                                               | -2.739 | 0.039                                               | -1.306 | <b>-1.654</b>                                         | -2.258               | -1.584                            |

Note: Focus countries that were chosen for identification of subnational climate–agriculture–gender inequality hotspots are highlighted.
