# Supplementary material for: Where women in agri-food systems are at highest climate risk: a methodology for mapping climate–agriculture–gender inequality hotspots
Source: Frontiers journal article supplement (doi:10.3389/fsufs.2023.1197809), 2023-11-16
Supplement: Data_Sheet_1.zip [file Data_Sheet_1.zip]

**Appendix D. Agricultural activity-specific climate–agriculture–gender inequality hotspot index values of subnational areas in the focus hotspot countries**

| Country    | Subnational area code | Subnational region                           | Cereals, legumes and oilseeds | Rice   | Vegetables , melons, roots and tubers | Perennials | Livestock | Mixed farming |
|------------|-----------------------|----------------------------------------------|-------------------------------|--------|---------------------------------------|------------|-----------|---------------|
| Bangladesh | BGDr201               | Barisal, Jhalokati, Pirojpur                 | 0.734                         | 0.453  | 0.636                                 | 0.334      | 0.553     | 1.346         |
|            | BGDr202               | Barguna, Bhola, Patuakhali                   | 0.359                         | 0.294  | 0.385                                 | 0.517      | 0.446     | -0.028        |
|            | BGDr203               | Chittagong                                   | -0.100                        | -0.420 | -0.390                                | -0.926     | -0.384    | 0.499         |
|            | BGDr204               | Bandarban, Cox s Bazar                       | 0.363                         | 0.274  | 0.200                                 | 0.275      | 0.364     | -0.150        |
|            | BGDr205               | Khagrachhari, Rangamati (Chattagram)         | -0.257                        | -0.415 | 0.091                                 | -0.432     | -0.385    | -0.339        |
|            | BGDr206               | Feni, Lakshmipur, Noakhali                   | 0.116                         | -0.238 | 0.087                                 | -0.697     | 0.095     | -0.040        |
|            | BGDr207               | Brahmanbaria, Chandpur, Comilla              | -0.605                        | -0.762 | -0.682                                | -1.235     | -0.364    | -1.071        |
|            | BGDr208               | Dhaka                                        | -0.430                        | -0.717 | -0.499                                | -0.047     | -0.600    | -1.171        |
|            | BGDr209               | Gazipur, Narayanganj, Narsingdi              | 0.697                         | 0.599  | 0.653                                 | 0.636      | 0.629     | 0.270         |
|            | BGDr210               | Jamalpur, Sherpur, Tangail                   | 0.968                         | 0.942  | 1.669                                 | 0.589      | 1.596     | 2.167         |
|            | BGDr211               | Kishoreganj, Mymensingh, Netrakona           | 0.619                         | 0.576  | 0.927                                 | 0.127      | 0.807     | 0.589         |
|            | BGDr212               | Faridpur, Manikganj, Rajbari                 | 0.504                         | 0.516  | 0.672                                 | 0.009      | 0.647     | 0.134         |
|            | BGDr213               | Gopalganj, Madaripur, Munshiganj, Shariatpur | 0.217                         | 0.117  | 0.052                                 | -0.429     | -0.090    | -0.021        |
|            | BGDr214               | Bagerhat, Khulna, Satkhira                   | 0.311                         | 0.356  | 0.419                                 | -0.191     | 0.389     | -0.114        |
|            | BGDr215               | Jessore, Magura, Narail                      | 0.351                         | 0.300  | 0.441                                 | -0.188     | 0.358     | -0.086        |

| Country         | Subnational area code | Subnational region                           | Cereals, legumes and oilseeds | Rice   | Vegetables , melons, roots and tubers | Perennials | Livestock | Mixed farming |
|-----------------|-----------------------|----------------------------------------------|-------------------------------|--------|---------------------------------------|------------|-----------|---------------|
|                 | BGDr216               | Chuadanga, Jhenaidah, Kushtia, Meherpur      | 0.298                         | 0.388  | 0.559                                 | 0.245      | 0.328     | -0.016        |
|                 | BGDr217               | Naogaon, Nawabganj, Rajshahi                 | 0.690                         | 0.627  | 0.919                                 | 0.677      | 1.128     | 0.424         |
|                 | BGDr218               | Natore, Pabna, Sirajganj                     | 0.507                         | 0.431  | 0.524                                 | 0.400      | 0.699     | 0.587         |
|                 | BGDr219               | Bogra, Gaibandha, Jaypurhat                  | 0.408                         | 0.449  | 0.575                                 | 1.251      | 0.455     | 0.515         |
|                 | BGDr220               | Dinajpur, Nilphamari, Panchagarh, Thakurgaon | 0.764                         | 0.694  | 0.982                                 | 0.957      | 1.111     | 1.114         |
|                 | BGDr221               | Kurigram, Lalmonirhat, Rangpur               | 0.493                         | 0.352  | 0.701                                 | 0.288      | 0.778     | 0.128         |
|                 | BGDr222               | Maulvibazar, Sylhet                          | 0.365                         | 0.237  | 0.012                                 | 0.326      | 0.099     | -0.344        |
|                 | BGDr223               | Habiganj, Sunamganj                          | 0.273                         | 0.248  | 0.282                                 | 0.974      | 0.110     | -0.253        |
| <b>Pakistan</b> | PAKr101               | Punjab                                       | -0.263                        | -0.099 | -0.469                                | -0.289     | -0.246    | 0.054         |
|                 | PAKr102               | Sindh                                        | -0.323                        | -0.116 | -0.669                                | -0.396     | -0.912    | -0.133        |
|                 | PAKr103               | Khyber Pakhtunkhwa (NWFrontier)              | -0.595                        | -0.302 | -0.407                                | -0.428     | -0.220    | -0.142        |
|                 | PAKr104               | Balochistan                                  | -0.391                        | -0.700 | -0.122                                | -0.308     | -0.179    | 0.125         |
|                 | PAKr105               | Islamabad (ICT)                              | -0.923                        | -0.368 | -0.872                                | -0.020     | -0.405    | -0.089        |
|                 | PAKr106               | Gilgit Baltistan                             |                               |        |                                       |            |           |               |
|                 | PAKr107               | AJK                                          |                               |        |                                       |            |           |               |
|                 | PAKr108               | Federally Administered Tribal Areas (FATA)   | -0.798                        | -0.328 | -0.345                                | -0.243     | 0.393     | 0.296         |
| <b>Mali</b>     | MLIr101               | Kayes                                        | 0.461                         | 0.334  | -0.102                                | 0.274      | -0.277    | -0.164        |
|                 | MLIr102               | Koulikoro                                    | -0.075                        | 0.888  | -0.231                                | 0.064      | -0.435    | 0.245         |
|                 | MLIr103               | Sikasso                                      | 0.323                         | 0.156  | -0.635                                | 0.213      | -0.873    | 0.155         |
|                 | MLIr104               | Segou                                        | 0.184                         | 0.342  | -0.034                                | 0.489      | 0.544     | -0.098        |

| Country       | Subnational area code | Subnational region | Cereals, legumes and oilseeds | Rice   | Vegetables , melons, roots and tubers | Perennials | Livestock | Mixed farming |
|---------------|-----------------------|--------------------|-------------------------------|--------|---------------------------------------|------------|-----------|---------------|
|               | MLIr105               | Mopti              | -0.442                        | 0.311  | -1.231                                | 0.063      | -0.864    | -0.651        |
|               | MLIr106               | Tombouctou         | -0.413                        | -0.918 | -0.819                                | -0.207     | -0.173    | -0.646        |
|               | MLIr107               | Gao and Kidal      | -1.415                        | -1.034 | -0.932                                | -0.917     | -0.731    | -0.577        |
|               | MLIr108               | Bamako             | -1.724                        | -0.394 | -1.044                                | -0.589     | -1.289    | -0.942        |
| <b>Zambia</b> | ZMBr101               | Central            | -0.318                        | -0.522 | -0.104                                | -0.417     | -1.225    | -0.109        |
|               | ZMBr102               | Copperbelt         |                               |        |                                       |            |           |               |
|               | ZMBr103               | Eastern            | 0.083                         | -0.909 | -0.091                                | 0.345      | -0.407    | 0.112         |
|               | ZMBr104               | Luapula            | 0.068                         | 0.514  | -0.472                                | 0.598      | 0.895     | -0.247        |
|               | ZMBr105               | Lusaka             | -0.597                        | 0.412  | -0.701                                | -0.760     | -0.967    | -0.605        |
|               | ZMBr106               | Northern           | -0.227                        | -0.472 | 0.006                                 | -0.401     | -0.303    | -0.364        |
|               | ZMBr107               | North-Western      | -0.301                        | -1.244 | -0.494                                | -0.504     | -0.730    | -0.529        |
|               | ZMBr108               | Southern           | 0.040                         | -0.850 | 0.553                                 | -0.027     | -0.365    | 0.169         |
|               | ZMBr109               | Western            |                               |        |                                       |            |           |               |

\* Note: Cells shaded grey indicate where data was missing (Pakistan PAKr106 Gilgit Baltistan and PAKr107 AJK; Zambia ZMBr102 Copperbelt and ZMBr109 Western) or the number of observations was insufficient to derive reliable statistics for that agricultural activity. The latter is the case for rice in Zambia (48 observations); vegetables and melons, roots and tubers in Mali (3 observations); perennial crops in Pakistan (7 observations); and mixed farming in Bangladesh (21 observations).

Detailed data of sub-indicators on the basis of which the subnational agricultural activity-specific climate–agriculture–gender inequality hotspot indices are calculated can be found in the Online Supplementary Materials.
