# Supplementary material for: Where women in agri-food systems are at highest climate risk: a methodology for mapping climate–agriculture–gender inequality hotspots
Source: Frontiers journal article supplement (doi:10.3389/fsufs.2023.1197809), 2023-11-16
Supplement: Data_Sheet_1.zip [file Data_Sheet_1.zip]

**Appendix C. Descriptive statistics of sub-indicators used in the computation of the subnational agricultural-activity specific climate–agriculture–gender inequality hotspot indices**

|                                                                                        | <b>N</b> | <b>Mean</b> | <b>S.D.</b> |
|----------------------------------------------------------------------------------------|----------|-------------|-------------|
| Share of rural population under climate hazard                                         | 44       | 0.592       | 0.366       |
| Subnational Gender Development Index 2019                                              | 44       | 0.885       | 0.077       |
| Missing women                                                                          | 44       | 102.587     | 2.318       |
| Prevalence of gender based violence                                                    | 44       | 33.631      | 12.066      |
| Prevalence of child marriage                                                           | 44       | 31.183      | 15.051      |
| Index of vulnerability due to gender inequalities                                      | 44       | 0.000       | 1.090       |
| <b>Cereals, legumes and oilseeds</b>                                                   |          |             |             |
| Participation in cereal, legumes and oilseeds farming                                  | 44       | 0.158       | 0.198       |
| Participation in cereal, legumes and oilseeds farming by women                         | 44       | 31.584      | 19.048      |
| Share of hours worked in cereal, legumes and oilseeds farming by women                 | 44       | 0.425       | 0.142       |
| Index of exposure experienced by women in cereal, legumes and oilseeds farming         | 44       | 0.000       | 1.243       |
| <b>Rice</b>                                                                            |          |             |             |
| Participation in rice farming                                                          | 44       | 0.121       | 0.120       |
| Participation in rice farming by women                                                 | 44       | 27.090      | 30.633      |
| Share of hours worked in rice farming by women                                         | 35       | 0.444       | 0.220       |
| Index of exposure experienced by women in rice farming                                 | 44       | 0.000       | 1.272       |
| <b>Vegetables, melons, roots and tubers</b>                                            |          |             |             |
| Participation in vegetable farming                                                     | 44       | 0.024       | 0.028       |
| Participation in vegetable farming by women                                            | 44       | 32.039      | 25.643      |
| Share of hours worked in vegetable farming by women                                    | 34       | 0.340       | 0.204       |
| Index of exposure experienced by women in vegetables, melons, roots and tubers farming | 44       | 0.000       | 1.433       |
| <b>Perennial crops</b>                                                                 |          |             |             |
| Participation in perennial crop farming                                                | 44       | 0.019       | 0.051       |

|                                                                  |    |        |        |
|------------------------------------------------------------------|----|--------|--------|
| Participation in perennial crop farming by women                 | 44 | 33.004 | 33.840 |
| Share of hours worked in perennial crop farming by women         | 37 | 0.289  | 0.238  |
| Index of exposure experienced by women in perennial crop farming | 44 | 0.000  | 1.337  |
| <b>Livestock</b>                                                 |    |        |        |
| Participation in livestock rearing                               | 44 | 0.036  | 0.040  |
| Participation in livestock rearing by women                      | 44 | 59.300 | 33.784 |
| Share of hours worked in livestock by women                      | 43 | 0.403  | 0.168  |
| Index of exposure experienced by women in livestock rearing      | 44 | 0.000  | 1.295  |
| <b>Mixed farming</b>                                             |    |        |        |
| Participation in mixed farming                                   | 44 | 0.047  | 0.070  |
| Participation in mixed farming by women                          | 44 | 18.305 | 26.903 |
| Share of hours worked in mixed farming by women                  | 36 | 0.237  | 0.245  |
| Index of exposure experienced by women in mixed farming          | 44 | 0.000  | 1.368  |
