# Supplementary material for: Where women in agri-food systems are at highest climate risk: a methodology for mapping climate–agriculture–gender inequality hotspots
Source: Frontiers journal article supplement (doi:10.3389/fsufs.2023.1197809), 2023-11-16
Supplement: Data_Sheet_1.zip [file Data_Sheet_1.zip]

## Sheet: Sheet1
Country			Sub-national region	Climate Hazard	Exposure																		Vulnerability due to gender inequalities					Climate-agriculture-gender inequality hotspot risk index (Anderson)							Robustness test - Climate-agriculture-gender inequality hotspot risk index (Average of standardised indicators)						Robustness test - Climate-agriculture-gender inequality hotspot risk index (PCA)
					Relative importance (in terms of labour participation) per crop/category						Female share in labour participation per crop/category						Share of hours worked by women (relative to men) per crop/category											Cereals, legumes, oil seed crops	Rice	Vegetables, melons, roots, tubers	Perennials	Livestock	Mixed farming		Cereals, legumes, oil seed crops	Rice	Vegetables, melons, roots, tubers	Perennials	Livestock	Mixed farming	Cereals, legumes, oil seed crops	Rice	Vegetables, melons, roots, tubers	Perennials	Livestock	Mixed farming
Country	iso3	subnationalcode	subnationalregion	hazard_shareruralpopclimatehazar	exposure_cereals	exposure_rice	exposure_vegetable	exposure_perennial	exposure_livestock	exposure_mixedfarming	exposure_sharecerealsfemale	exposure_sharericefemale	exposure_sharevegetablefemale	exposure_shareperennialfemale	exposure_sharelivestockfemale	exposure_sharemixedfarmingfemale	hrs_sh_cereals_f	hrs_sh_rice_f	hrs_sh_vegetable_f	hrs_sh_perennial_f	hrs_sh_livestock_f	hrs_sh_mixedfarming_f	SGDI 2019	Missing women	Domestic violence	Share_married1519	vulnerability_index	Anderson_risk_cereals	Anderson_risk_rice	Anderson_risk_vegetable	Anderson_risk_perennial	Anderson_risk_livestock	Anderson_risk_mixedfarming		overall_risk_cereals	overall_risk_rice	overall_risk_vegetable	overall_risk_perennial	overall_risk_livestock	overall_risk_mixedfarming	risk_cereals	risk_rice	risk_vegetable	risk_perennial	risk_livestock	risk_mixedfarming
Bangladesh	BGD	BGDr201	Barisal, Jhalokati, Pirojpur	1	0.079776	0.185558	0.0577365	0.00419969	0.0351286	5.54686e-05	51.2184	13.8113	39.9816	3.03431	84.2638	100	0.493927	0.496328	0.494322	0.553616	0.532199	0	0.914	103.192	35.023	32.9552	0.148799	0.733966	0.452683	0.635854	0.334232	0.553269	1.34612		0.657707	0.39338	0.715973	0.333628	0.656996	1.28189	0.412067	-0.795663	1.43265	0.978704	1.30673	0.436056
Bangladesh	BGD	BGDr202	Barguna, Bhola, Patuakhali	0.8883	0.118398	0.240445	0.0173045	0.0110984	0.0152995	0.00059624	29.8846	11.2002	47.1285	40.9872	93.0388	0	0.451259	0.461534	0.41438	0.6046	0.427387	0	0.898	102.741	31.25	39.6201	0.238746	0.358585	0.294159	0.385488	0.517161	0.445792	-0.0283852		0.343338	0.278934	0.447873	0.490041	0.51023	0.0251462	0.652806	-0.669451	0.827269	0.378406	0.95613	0.873235
Bangladesh	BGD	BGDr203	Chittagong	0.327415	0.0369999	0.0943163	0.010567	0.000183204	0.0167724	0.00020835	60.9584	24.1293	44.1841	0	65.3911	100	0.477144	0.455382	0.408636	0	0.479392	0	0.906	102.146	28.7425	20.7061	-0.785152	-0.100465	-0.420282	-0.390373	-0.926011	-0.384219	0.499414		-0.186781	-0.473634	-0.424591	-0.895246	-0.40821	0.384233	-1.24279	0.436995	-0.497238	-0.0213994	-0.492508	-1.43659
Bangladesh	BGD	BGDr204	Bandarban, Cox s Bazar	0.656992	0.0577931	0.227621	0.0140581	0.0390337	0.0158536	0.00683545	39.5394	31.1949	24.1288	33.3499	56.1685	0	0.530448	0.518928	0.436433	0.518238	0.584733	0	0.893	107.901	31.9588	43.8188	0.476892	0.362915	0.273851	0.200227	0.274687	0.363656	-0.150482		0.371486	0.303779	0.189938	0.291416	0.333648	-0.108177	-0.0885307	0.134449	0.151605	0.136167	0.466	0.58769
Bangladesh	BGD	BGDr205	Khagrachhari, Rangamati (Chattagram)	0.267201	0.110902	0.30014	0.109067	0.0110457	0.00950925	0.0356024	52.4981	34.3879	53.2906	54.8301	86.4442	29.6835	0.475841	0.478615	0.471649	0.372308	0.463602	0.541534	0.874	99.7321	26.4706	19.7082	-0.949169	-0.256781	-0.415197	0.0909583	-0.431989	-0.384872	-0.338972		-0.342387	-0.496159	-0.01049	-0.498157	-0.421415	-0.389927	-1.30173	0.714854	0.420602	-1.10968	-0.448737	-1.32211
Bangladesh	BGD	BGDr206	Feni, Lakshmipur, Noakhali	0.297525	0.0442704	0.203306	0.0375671	0.00120062	0.0250974	0.00144311	56.9307	19.0152	33.3263	0	75.7406	27.8689	0.510419	0.523719	0.425017	0	0.470966	0.438356	0.916	101.978	33.6283	38.7535	0.331053	0.115795	-0.238248	0.0869704	-0.69716	0.0948768	-0.0398996		0.134154	-0.138391	-0.0395606	-0.580048	-0.0410302	-0.0639194	-1.10583	0.633277	-0.287064	0.315848	-0.261764	-0.392941
Bangladesh	BGD	BGDr207	Brahmanbaria, Chandpur, Comilla	0	0.070769	0.220393	0.0145406	0	0.0222008	0.00173495	42.8359	19.1885	20.8646	0	76.948	0	0.482572	0.512088	0.419732	0	0.591001	0	0.918	102.24	23.5154	28.6128	-0.740278	-0.605253	-0.761641	-0.681706	-1.23519	-0.364423	-1.07117		-0.622166	-0.744029	-0.807422	-1.17966	-0.514315	-1.08192	-1.62038	1.0771	-1.34075	-0.625012	-0.757604	-1.43628
Bangladesh	BGD	BGDr208	Dhaka	0	0.0142939	0.029738	0.00979451	0.00040118	0.013032	0.00313873	67.4093	38.8266	72.9899	100	84.0187	0	0.486272	0.469675	0.451009	0	0.467284	0	0.907	103.906	19.2983	26.5056	-1.08299	-0.429756	-0.717486	-0.499138	-0.046614	-0.599608	-1.17078		-0.512659	-0.764615	-0.633931	-0.206861	-0.712288	-1.18577	-2.08894	1.23224	-0.81332	-2.71293	-1.00319	-1.65772
Bangladesh	BGD	BGDr209	Gazipur, Narayanganj, Narsingdi	1	0.029052	0.0860728	0.0158176	0.0030443	0.017498	0.0011194	39.7119	23.3012	42.8979	29.543	63.059	0	0.458441	0.435197	0.382596	0.498054	0.443997	0	0.905	102.43	42.6923	39.8722	0.929798	0.697283	0.598693	0.653375	0.636208	0.629201	0.270124		0.720839	0.643095	0.709328	0.676469	0.680846	0.338539	0.890736	-0.705533	1.02111	1.06582	0.994306	1.52958
Bangladesh	BGD	BGDr210	Jamalpur, Sherpur, Tangail	1	0.0931378	0.248858	0.0517172	0.00134775	0.026847	0.000453477	17.5385	15.281	50.0288	0	94.8346	100	0.494166	0.499486	0.445637	0	0.430303	0	0.878	102.974	68.6225	49.6032	2.94055	0.967521	0.942456	1.66906	0.588518	1.59647	2.16669		1.19729	1.25957	1.56239	0.857563	1.45913	2.13609	1.53167	-0.531326	1.73091	2.57036	1.653	2.23582
Bangladesh	BGD	BGDr211	Kishoreganj, Mymensingh, Netrakona	1	0.0878043	0.328626	0.0173739	0.00150274	0.0241988	0.0100792	23.1774	12.2858	88.7469	0	84.0439	7.33603	0.509129	0.493685	0.373968	0	0.489535	0.417661	0.914	102.03	44.8141	37.3245	0.93441	0.618845	0.575722	0.92698	0.12707	0.806611	0.588646		0.65388	0.624971	0.954498	0.244086	0.84536	0.627176	1.02042	-0.747877	1.51727	1.85904	1.32793	1.38922
Bangladesh	BGD	BGDr212	Faridpur, Manikganj, Rajbari	1	0.101864	0.212358	0.0382483	0.00403766	0.0313467	0.0231321	20.7149	14.222	41.9211	0	90.9419	0	0.521504	0.513742	0.521296	0	0.491586	0	0.907	101.34	36.3636	36.7662	0.407944	0.503799	0.51584	0.671553	0.00880121	0.64691	0.13369		0.491007	0.488333	0.740562	0.0854969	0.728486	0.194218	0.92444	-0.739297	1.35058	1.66799	1.33282	1.1855
Bangladesh	BGD	BGDr213	Gopalganj, Madaripur, Munshiganj, Shariatpur	0.848879	0.08153	0.3246	0.0444176	0.00165567	0.0112885	0.0180761	37.0811	13.5066	45.473	0	83.5244	4.75531	0.4991	0.497273	0.380367	0	0.400428	0.502693	0.921	103.377	21.2598	29.3306	-0.843614	0.216974	0.116512	0.0516338	-0.429263	-0.0903088	-0.0209171		0.0894286	-0.0464816	0.165043	-0.437147	0.0622915	-0.0166519	0.154619	-0.597724	0.79872	0.94249	0.539033	-0.0613133
Bangladesh	BGD	BGDr214	Bagerhat, Khulna, Satkhira	0.949185	0.0727694	0.167527	0.0212614	0.00111963	0.0245552	0.000269633	29.5329	18.5298	75.3146	0	85.4738	0	0.462655	0.485339	0.396281	0	0.546245	0	0.892	99.5383	21.8274	41.6043	-0.229405	0.311415	0.356056	0.419076	-0.190719	0.389002	-0.11437		0.247138	0.251582	0.513766	-0.158509	0.508114	-0.062867	0.704975	-0.689752	1.2077	1.35102	1.17343	0.686528
Bangladesh	BGD	BGDr215	Jessore, Magura, Narail	0.874191	0.101784	0.210095	0.0622222	0.00485002	0.0131304	0.00137276	29.4824	14.1127	24.9741	0	78.5434	0	0.487271	0.492722	0.460779	0	0.488827	0	0.903	103.853	20	50.9004	0.0829251	0.350621	0.300417	0.441263	-0.187756	0.357511	-0.0855799		0.317315	0.258334	0.497152	-0.127629	0.432294	-0.0348157	0.529502	-0.569298	1.00507	1.31319	0.867919	0.745853
Bangladesh	BGD	BGDr216	Chuadanga, Jhenaidah, Kushtia, Meherpur	1	0.138162	0.261976	0.0185626	0.0158188	0.0189522	0.00302034	15.5189	12.8546	83.2722	3.5004	70.6297	0	0.474704	0.46791	0.406151	0.462406	0.47958	0	0.904	102.669	24.4565	42.2765	-0.0480694	0.298034	0.388449	0.559411	0.244539	0.327622	-0.015732		0.258588	0.30788	0.653072	0.235666	0.459166	0.0407551	1.0134	-0.867726	1.40509	0.977803	0.994011	0.898469
Bangladesh	BGD	BGDr217	Naogaon, Nawabganj, Rajshahi	1	0.0566445	0.285723	0.0379231	0.00854092	0.159693	0	21.1551	8.88951	22.6247	9.34985	90.8431	0	0.507069	0.480099	0.486435	0.551975	0.463728	0	0.891	103.692	40.099	54.5141	1.45593	0.689919	0.626509	0.919038	0.67705	1.12767	0.423852		0.778301	0.75331	0.932451	0.76919	1.11241	0.498691	1.18507	-0.771725	1.20665	1.37677	1.6318	1.86918
Bangladesh	BGD	BGDr218	Natore, Pabna, Sirajganj	1	0.151122	0.180222	0.0149482	0.0118673	0.0960457	0.00236137	25.3785	9.59674	41.5024	7.4512	90.2099	20.7958	0.47298	0.458747	0.484572	0.512256	0.500344	0.528736	0.884	103.81	31.5789	42.5213	0.399482	0.506847	0.430805	0.524326	0.399945	0.698731	0.586721		0.492605	0.417007	0.608807	0.417132	0.777126	0.604147	0.914955	-0.890401	1.08699	1.0551	1.436	0.974171
Bangladesh	BGD	BGDr219	Bogra, Gaibandha, Jaypurhat	1	0.103215	0.237166	0.0189754	0.000394926	0.0130909	0.0805389	16.5623	9.77182	46.6953	100	71.0882	3.36835	0.499617	0.491248	0.522021	0	0.465114	0.546433	0.88	102.51	33.7723	37.8884	0.3196	0.407597	0.448626	0.574501	1.25132	0.454811	0.515181		0.397485	0.418399	0.656078	1.1322	0.555332	0.536182	1.03305	-0.840695	1.22382	-0.322665	1.02028	0.944394
Bangladesh	BGD	BGDr220	Dinajpur, Nilphamari, Panchagarh, Thakurgaon	0.954588	0.138863	0.314527	0.0126985	0.000603676	0.0149815	0.000755556	19.2602	14.5139	35.4428	24.6137	87.127	30.8809	0.519533	0.491281	0.47532	0.78125	0.45417	0.647059	0.887	102.736	53.8793	45.0256	1.8447	0.764282	0.69374	0.981976	0.957349	1.11102	1.11409		0.888581	0.873527	0.961059	1.04669	1.05681	1.13292	1.10386	-0.561333	1.06083	1.06379	1.33473	1.75626
Bangladesh	BGD	BGDr221	Kurigram, Lalmonirhat, Rangpur	0.770581	0.0862605	0.257412	0.0506407	0.00587058	0.0308485	3.0176e-05	33.0934	13.1406	18.4153	22.7812	91.2889	0	0.485112	0.490499	0.501891	0.302885	0.478172	0	0.892	103.139	40.4545	46.5899	1.11221	0.493208	0.351591	0.700708	0.28754	0.778346	0.127634		0.562872	0.472186	0.662215	0.381564	0.723126	0.184793	0.464517	-0.304602	0.802765	0.955124	0.976776	1.21421
Bangladesh	BGD	BGDr222	Maulvibazar, Sylhet	0.937565	0.110635	0.178374	0.0110892	0.0813725	0.0130718	0.00112006	41.0031	19.8868	55.645	41.9637	89.2029	0	0.518104	0.498211	0.452923	0.537597	0.545135	0	0.913	104.121	26.087	20.0451	-0.977965	0.36549	0.237396	0.0124866	0.326457	0.0990671	-0.343547		0.202686	0.0298428	0.166389	0.197765	0.279221	-0.301816	0.172199	-0.692984	0.881364	-0.0235329	1.05141	0.181669
Bangladesh	BGD	BGDr223	Habiganj, Sunamganj	0.968076	0.160424	0.293988	0.0197639	0.000901397	0.0234153	0	25.5698	13.6952	81.4315	100	87.9846	0	0.499987	0.47701	0.419043	0	0.456801	0	0.899	102.257	33.1445	15.5804	-0.754154	0.272647	0.247616	0.281835	0.973684	0.110101	-0.252681		0.150497	0.0751371	0.412685	0.775205	0.287444	-0.206371	0.556614	-0.841837	1.27204	-0.764569	0.9673	0.383985
Mali	MLI	MLIr101	Kayes	0.0945487	0.741179	0.0919499	0.000325507	0.00888461	0.0330774	0	52.4889	94.9962	100	90.2116	0	0	0.432028	0.463709	0	0.32177	0	0	0.816	105.113	44.4876	61.4198	2.07668	0.461045	0.333923	-0.101505	0.274029	-0.276624	-0.164358		0.639114	0.623644	-0.333111	0.421698	-0.565956	-0.135448	-1.48539	2.06061	-1.79978	-0.640426	-2.15741	0.559078
Mali	MLI	MLIr102	Koulikoro	0.214899	0.542843	0.00176012	0	0.00953235	0.0142982	0.168081	11.8861	100	0	49.9179	0	0.11586	0.433836	0	0	0.382993	0	0.540003	0.912	102.779	49.453	44.3024	1.53341	-0.0750206	0.888442	-0.231372	0.0639065	-0.43525	0.244611		0.114114	0.988373	-0.389757	0.192895	-0.636052	0.230067	-0.459004	2.71352	-1.62257	-0.290988	-2.03906	0.225472
Mali	MLI	MLIr103	Sikasso	0.367759	0.581172	0.0449138	0.000796723	0.0688971	0.0103254	0.0635204	55.2832	72.0939	100	79.6077	0	44.277	0.451498	0.469026	0	0.471933	0	0.458021	0.88	101.55	29.9026	40.416	0.204752	0.322535	0.156416	-0.63459	0.213034	-0.872796	0.154795		0.298152	0.16455	-0.657049	0.1856	-0.90619	0.117157	-1.24714	1.1	-1.46921	-0.946969	-1.96308	-0.419453
Mali	MLI	MLIr104	Segou	0.0931809	0.702624	0.047085	0	0.0264478	0.0320625	0.0176177	20.2772	92.7637	0	96.0705	45.7603	0	0.473157	0.458642	0	0.500722	0.448657	0	0.889	100.645	50.5141	58.4732	2.26104	0.18439	0.341922	-0.0335478	0.488949	0.544445	-0.0978298		0.423303	0.66084	-0.277963	0.624644	0.185179	-0.0680544	-0.942855	2.03955	-1.78178	-0.847373	-0.709793	0.669247
Mali	MLI	MLIr105	Mopti	0.0705909	0.648421	0.00893535	0	0.00150199	0.0162005	0.0625656	35.7966	100	0	100	14.1568	6.59004	0.427475	0	0	0	0.493	0.511921	0.921	101.606	15.712	35.0601	-0.911435	-0.441582	0.311497	-1.23084	0.0629489	-0.86405	-0.650784		-0.500675	0.109349	-1.2689	-0.0890851	-0.941909	-0.698197	-1.71458	2.77289	-2.18277	-2.52043	-1.54514	-1.59885
Mali	MLI	MLIr106	Tombouctou	0.316984	0.196923	0	0	0.074397	0.153172	0	21.352	0	0	41.5059	44.9257	0	0.431392	0	0	0.394223	0.481689	0	0.868	103.818	14.7142	51.0243	-0.207836	-0.412928	-0.918366	-0.819245	-0.20712	-0.173438	-0.646284		-0.385938	-0.78726	-0.829458	-0.22122	-0.25081	-0.631795	-0.465054	-0.546298	-1.61605	-0.761576	-0.439087	-0.493644
Mali	MLI	MLIr107	Gao and Kidal	0.241252	0.160616	0.00232741	0	0.00137483	0.0622531	0.243707	0	0	0	0	0.491204	0	0	0	0	0	0.374387	0	0.899	102.998	22.4984	37.3756	-0.387631	-1.41525	-1.03352	-0.932149	-0.917214	-0.730841	-0.576502		-1.27199	-0.911136	-0.953373	-0.85092	-0.785992	-0.586307	0.781753	-0.421339	-1.78614	-0.0457192	-1.45463	-0.837155
Mali	MLI	MLIr108	Bamako	0	0.00175319	0.00149513	0	0.00470956	0.0030214	0	0	59.1782	0	34.0496	0	0	0	0.516129	0	0.502195	0	0	0.942	102.267	40.3296	16.7156	-0.296451	-1.72395	-0.393512	-1.0441	-0.589267	-1.28874	-0.942095		-1.5313	-0.367648	-1.14504	-0.58155	-1.39941	-0.947373	0.432133	1.64129	-2.25343	-1.31141	-2.76917	-1.14953
Pakistan	PAK	PAKr101	Punjab	0.748789	0.0140798	0.014242	0.00034166	0.000705773	0.159365	0.257799	24.6107	15.7493	22.0175	17.0061	77.313	31.0809	0.435733	0.469056	0.488263	0.386667	0.42848	0.421959	0.829	104.697	22.1491	15.7007	-1.36685	-0.262738	-0.099413	-0.469431	-0.28948	-0.245531	0.0537884		-0.388882	-0.310024	-0.323936	-0.38407	-0.0878522	0.0162359	0.278731	-0.484138	0.0582199	0.0124316	0.466032	-0.729459
Pakistan	PAK	PAKr102	Sindh	0.940181	0.0463957	0.00755596	0.0127473	0.0032227	0.0380878	0.113402	13.3165	12.0769	15.6695	0.923557	8.55582	20.9033	0.431341	0.367673	0.375897	0.318732	0.405854	0.46479	0.77	104.752	12.8875	12.5409	-2.03287	-0.322751	-0.116236	-0.669394	-0.395501	-0.91166	-0.132724		-0.517617	-0.436087	-0.4138	-0.532145	-0.595584	-0.152506	0.731951	-1.1062	0.239608	0.354998	-0.245993	-0.72787
Pakistan	PAK	PAKr103	Khyber Pakhtunkhwa (NWFrontier)	0.563552	0.0214065	0.0029592	0.00136424	0.000426098	0.108682	0.120583	3.35278	1.44892	25.558	19.4228	70.6018	21.1514	0.419595	0.490034	0.425121	0.243243	0.429623	0.387002	0.717	105.307	35.4525	8.66686	-0.834466	-0.595134	-0.302361	-0.407321	-0.428269	-0.219825	-0.142391		-0.614015	-0.38691	-0.351576	-0.458377	-0.164711	-0.166049	0.413135	-0.251669	-0.293196	-0.0244182	0.0472938	-0.648005
Pakistan	PAK	PAKr104	Balochistan	0.471606	0.0210413	0	0.0333232	0.00311349	0.0408236	0.178999	5.16039	0	4.14476	5.19406	32.9653	20.9058	0.479505	0	0.400528	0.375817	0.440805	0.451213	0.692	107.865	44.4712	16.0911	0.0592202	-0.391124	-0.700177	-0.121736	-0.307548	-0.178691	0.125095		-0.331805	-0.56486	-0.154909	-0.264663	-0.214126	0.0989376	0.21923	-0.809759	-0.360624	0.110909	-0.474564	-0.283083
Pakistan	PAK	PAKr105	Islamabad (ICT)	1	0.0328174	0	0	0.00600871	0.0700419	0.09604	0	0	0	14.2857	34.5075	1.96759	0	0	0	0.471204	0.471543	0.410884	0.856	106.341	17.0902	20.6352	-1.45683	-0.922596	-0.36766	-0.871962	-0.0196811	-0.404698	-0.0888744		-0.962951	-0.547715	-0.589912	-0.144272	-0.136859	-0.0815401	2.23691	-1.91671	-0.404355	0.385481	0.42895	-0.163809
Pakistan	PAK	PAKr108	FATA	0.76145	0.00341121	0	0	0	0.0596558	0.0628291	0	0	0	0	75.4564	13.0222	0	0	0	0	0.47013	0.425844	0.55	106.182	51.1979	11.844	0.343465	-0.797904	-0.327979	-0.344628	-0.243247	0.392578	0.296439		-0.641901	-0.214143	-0.25634	-0.155212	0.40735	0.305802	2.11181	-1.32203	-0.674365	1.20063	0.686977	0.519454
Zambia	ZMB	ZMBr101	Central	0.439571	0.14023	0.00334209	0.0591442	0.00440204	0.0381591	0.147871	42.2214	50.1197	38.3739	33.5723	0	32.8082	0.365475	0	0.46159	0.3125	0	0.455875	0.977	98.8836	31.8228	16.1613	-0.849131	-0.317557	-0.522471	-0.104369	-0.416597	-1.2246	-0.108708		-0.379248	-0.569257	-0.125116	-0.460099	-1.14326	-0.153403	-0.507016	-0.165721	0.158765	-0.475265	-1.95354	-0.956507
Zambia	ZMB	ZMBr103	Eastern	0.291848	0.547011	0	0.00881014	0.001335	0.0170489	0.133094	49.2881	0	28.7144	75.9451	13.2136	44.3376	0.427013	0	0.563836	0	0.465733	0.497632	0.971	98.3429	41.233	22.5719	0.0108966	0.0834178	-0.909246	-0.0912248	0.345248	-0.407146	0.111721		0.067351	-0.743231	-0.192246	0.270505	-0.490319	0.0598585	-1.24632	-0.481166	-0.435091	-1.54859	-1.03116	-0.7233
Zambia	ZMB	ZMBr104	Luapula	0.716756	0.0307672	0.0112464	0.00741953	0.324352	0.00281895	0.00612576	45.5293	66.1109	0	49.0591	100	0	0.323741	0.526316	0	0.45977	0	0	0.928	98.9903	47.4003	13.3363	-0.0219409	0.0679965	0.5142	-0.47223	0.597997	0.894628	-0.24673		0.058284	0.418079	-0.376713	0.516159	0.8789	-0.206862	0.34479	0.446284	-0.738657	-0.516786	1.8145	0.379216
Zambia	ZMB	ZMBr105	Lusaka	0.242836	0.0324032	0.000553818	0.0163719	0.00867334	0.0116674	0.0185769	40.919	100	38.5952	25.8808	33.6588	30.1857	0.448	0	0.399509	0.354894	0.400091	0.398542	0.98	98.9129	30.3607	5.06613	-1.4483	-0.596573	0.412459	-0.701317	-0.759943	-0.967213	-0.605067		-0.695873	0.101744	-0.715479	-0.833989	-0.941564	-0.65416	-1.10937	2.4081	-0.761644	-1.03895	-1.28158	-1.64533
Zambia	ZMB	ZMBr106	Northern	0.126216	0.232609	0.00720192	0.0556135	0.0581602	0.0156533	0.00610302	46.7091	22.0756	51.14	38.4498	78.3672	36.2842	0.502189	0.573913	0.50327	0.466667	0.414201	0.347561	0.928	99.9101	40.8533	16.0048	-0.290191	-0.226537	-0.472222	0.0062813	-0.401042	-0.302514	-0.363696		-0.239158	-0.432426	-0.157091	-0.410612	-0.436754	-0.405739	-1.52258	1.01101	-0.231514	-1.16908	-0.796696	-1.11911
Zambia	ZMB	ZMBr107	North-Western	0.246511	0.181241	0.00186584	0.030721	0.0210425	0.0114907	0.0192049	59.9097	0	44.0942	56.737	80.8534	34.922	0.485041	0	0.629104	0.506537	0.443709	0.563165	0.954	99.2989	23.8757	8.52786	-1.66212	-0.300938	-1.24443	-0.494213	-0.504483	-0.729791	-0.529371		-0.467252	-1.29619	-0.522328	-0.640057	-0.706883	-0.593606	-1.68989	-0.539518	-0.259454	-1.5749	-0.703459	-1.83743
Zambia	ZMB	ZMBr108	Southern	0.337135	0.0416526	0.00107679	0.12106	0.00447155	0.0148294	0.163891	65.5364	0	51.1231	52.914	17.5512	42.1843	0.405446	0	0.467867	0.55814	0.439024	0.488661	0.972	99.2418	44.4319	19.5922	0.064358	0.0397106	-0.84953	0.553392	-0.0265852	-0.365481	0.169307		0.0370842	-0.685646	0.400805	-0.0360879	-0.437965	0.120445	-0.977948	-0.560396	0.749381	-0.77939	-0.945184	-0.604796
